# Supplementary material for: Iron polypyridyl complex adsorbed on carbon surfaces for hydrogen generation
Source: Royal Society of Chemistry journal article supplement (doi:10.1039/d1cc02131a), 2021-01-01
Supplement: d1cc02131a1.pdf [file d1cc02131a1.pdf]

*Electronic Supplementary Information for*

**Iron Polypyridyl Complex Adsorbed on Carbon Surfaces for  
Hydrogen Generation**

Caroline M. Margonis, Marissa Ho, Benjamin D. Travis, William W. Brennessel<sup>†</sup> and William R. McNamara\*

\*Department of Chemistry, The College of William and Mary, Williamsburg VA

<sup>†</sup>Department of Chemistry, University of Rochester, Rochester NY

\*Correspondence to: [wrmcnamara@wm.edu](mailto:wrmcnamara@wm.edu)

## Table of Contents

|                                                                              |          |
|------------------------------------------------------------------------------|----------|
| <b>Materials and Methods</b>                                                 | <b>4</b> |
| <i>Materials</i>                                                             | 4        |
| <i>Instrumentation</i>                                                       | 4        |
| <i>X-ray diffractometry</i>                                                  | 4        |
| <i>Scheme S1 Synthesis of 3</i>                                              | 4        |
| <i>Scheme S2 Synthesis of 4</i>                                              | 5        |
| <i>Scheme S3 Synthesis of 5</i>                                              | 5        |
| <i>Scheme S4 Synthesis of 2</i>                                              | 6        |
| <i>Table S1 Preparation of buffer solutions</i>                              | 6        |
| <i>Cyclic voltammetry general procedure</i>                                  | 7        |
| <i>Scan rate dependence study</i>                                            | 7        |
| <i>Adsorption time-dependence study</i>                                      | 7        |
| <i>Solvent-stability study</i>                                               | 7        |
| <i>Catalyst adsorption control study</i>                                     | 8        |
| <i>Figure S1 Structure of catalysts used in the adsorption control study</i> | 8        |
| <i>Acid addition studies</i>                                                 | 8        |
| <i>pH dependence study</i>                                                   | 8        |
| <b>Supplementary Text</b>                                                    | <b>9</b> |
| <i>Determination of overpotential</i>                                        | 9        |
| <i>Figure S2 Determination of overpotential</i>                              | 10       |
| <i>Calculation of <math>i_c/i_p</math></i>                                   | 11       |
| <i>Figure S3 Calculation of <math>i_c/i_p</math></i>                         | 11       |
| <i>Surface coverage calculation</i>                                          | 11       |
| <i>Figure S4 <math>^1\text{H}</math> NMR of 3</i>                            | 12       |
| <i>Figure S5 <math>^1\text{H}</math> NMR of 4</i>                            | 13       |
| <i>Figure S6 <math>^1\text{H}</math> NMR of 5</i>                            | 14       |
| <i>Figure S7 ORTEP diagram of 2</i>                                          | 14       |
| <i>Table S2 Crystal structure and refinement data for 2</i>                  | 15       |
| <i>Figure S8 CVs for adsorption-time dependence study for 2</i>              | 16       |
| <i>Figure S9 Adsorption kinetics as a function of time for 2</i>             | 17       |

|                   |                                                                                |           |
|-------------------|--------------------------------------------------------------------------------|-----------|
| <i>Figure S10</i> | <i>CVs for solvent-stability study for 2</i>                                   | 18        |
| <i>Figure S11</i> | <i>CVs for catalyst adsorption control study</i>                               | 19        |
| <i>Figure S12</i> | <i>CVs for toxic acid additions with surface-adsorbed 2</i>                    | 20        |
| <i>Figure S13</i> | <i>Linear relationship between Fe(III)/Fe(II) reduction potential and pH</i>   | 21        |
| <i>Figure S14</i> | <i>Linear relationship between catalytic proton reduction potential and pH</i> | 22        |
| <i>Figure S15</i> | <i>Bulk Electrolysis of 2 in CH<sub>3</sub>CN with TFA</i>                     | 23        |
| <i>Figure S16</i> | <i>CV of GC working electrode (no catalyst) with added TFA</i>                 | 24        |
| <b>References</b> |                                                                                | <b>25</b> |

## Materials and Methods

### Materials

All experiments were carried out using standard Schlenk techniques under an Ar atmosphere unless otherwise indicated. All reagents were purchased from Acros Organics, Alfa Aesar, Fisher Scientific, or TCL and were used without further purification unless otherwise noted. Tetra-*n*-butylammonium hexafluorophosphate (TBAPF<sub>6</sub>) was recrystallized from absolute ethanol.

### Instrumentation

<sup>1</sup>H and <sup>13</sup>C NMR spectra were recorded on an Agilent 400MR DD2 spectrometer operating in the pulse Fourier transform mode. Chemical shifts are reported in ppm and referenced to residual solvent.

### X-ray Diffraction

Data collection, structure solution, and structure refinement were conducted by William W. Brennessel at the University of Rochester's X-ray Crystallographic Facility. A single crystal was placed onto a thin glass optical fiber and mounted onto a Rigaku XtaLAB Synergy-S Dualflex diffractometer equipped with a HyPix-6000HE HPC area detector. Data collection was carried out using a PhotonJet (Cu) X-ray source. The structure was solved using SHELXT and refined using SHELXL.

Reflection contributions from highly disordered solvent (likely dichloromethane) were fixed and added to the calculated structure factors using the SQUEEZE routine of program Platon,<sup>ref</sup> which determined there to be 599 electrons in 1504 Å<sup>3</sup> treated this way. Because the exact identity and amount of solvent were unknown, no solvent was included in the atom list or molecular formula. Thus all calculated quantities that derive from the molecular formula (e.g., F(000), density, molecular weight, etc.) are known to be inaccurate. [ref = Spek, A. L. *PLATON*, version 150216; *Acta. Crystallogr.* **2015**, *C71*, 9-18.]

### Syntheses

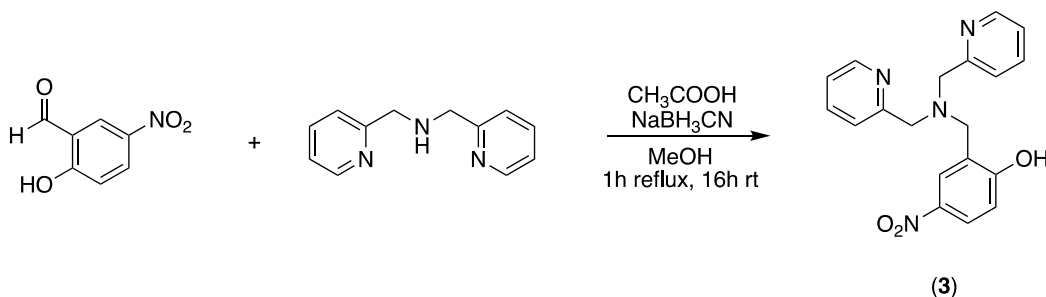

**Scheme S1.** Synthesis of **3**.

**2-((bis(pyridin-2-ylmethyl)amino)methyl)-4-nitrophenol (3).** This compound was synthesized using a modified literature procedure.<sup>1</sup> To a solution of 2-hydroxy-5-nitrobenzaldehyde (3.34 g, 20 mmol) in 100 mL of MeOH was added bis(pyridine-2-ylmethyl)amine (3.6 mL, 20 mmol). Glacial acetic acid (3 drops) was added followed by a solution of sodium cyanoborohydride (0.62 g, 10 mmol) in 30 mL of MeOH. After refluxing for 1 hour, the solution was stirred at room temperature overnight. 1 M HCl was added to the resulting solution until it reached pH = 4. The red solution was evaporated to dryness, dissolved in 100 mL of saturated Na<sub>2</sub>CO<sub>3</sub>, and extracted with chloroform (3 x 100 mL). The organic layers were combined, dried with Na<sub>2</sub>SO<sub>4</sub>, and filtered through celite. The solvent was removed under vacuum to yield a red oil, which was purified using silica gel chromatography with 9:1 dichloromethane:methanol to give 1.80 g of **1** (62% yield). <sup>1</sup>H NMR (CDCl<sub>3</sub>): δ 8.58 (m, 2H), 8.12 (d, 1H), 8.05 (d, 1H), 7.66 (td, 2H), 7.30 (d, 2H), 7.21 (t, 2H), 6.95 (d, 1H), 3.93 (s, 4H), 3.85 (s, 2H). <sup>13</sup>C NMR (CDCl<sub>3</sub>): δ 164.27, 157.71, 148.69, 139.68, 137.06, 126.54, 125.61, 123.52, 123.08, 122.41, 117.17, 58.67, 56.10.

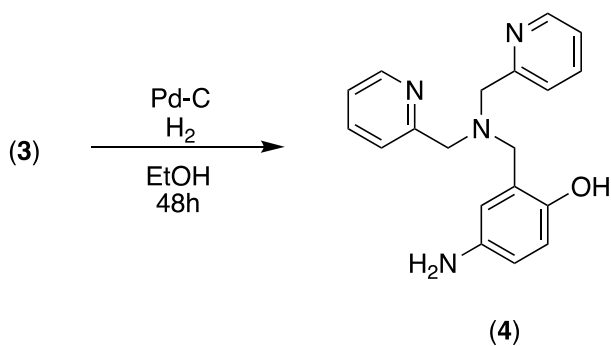

**Scheme S2.** Synthesis of **4**.

**Synthesis of 4-amino-2-((bis(pyridin-2-ylmethyl)amino)methyl)phenol (4).** Compound **4** was synthesized using a modified literature procedure.<sup>2</sup> To a solution of **3** (1 g, 2.86 mmol) in 180 mL EtOH, palladium on activated carbon (10% Pd) (0.1 g) was added. The reaction vessel was degassed, replenished with hydrogen gas, and allowed to stir at room temperature for 2 days. The brown solution was filtered through celite and evaporated to dryness to give 0.87 g of **4** (95 % yield). <sup>1</sup>H NMR (CDCl<sub>3</sub>): 8.56 (m, 2H), 7.63 (td, 2H), 7.34 (d, 2H), 7.15 (m, 2H), 6.74 (d, 1H), 6.57 (dd, 1H), 6.48 (d, 1H), 3.85 (s, 4H), 3.71 (s, 2H).

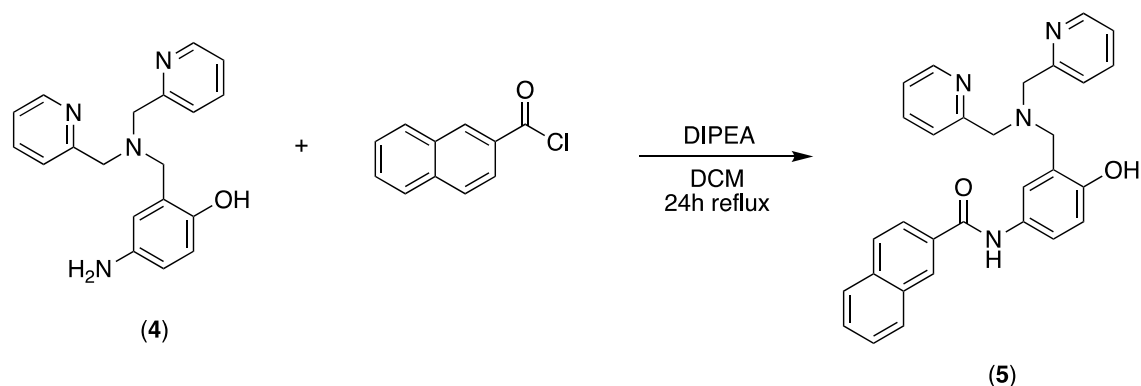

**Scheme S3.** Synthesis of **5**.

**Synthesis of *N*-(3-((bis(pyridin-2-ylmethyl)amino)methyl)-4-hydroxyphenyl)-2-naphthamide (**5**).** Compound **5** was synthesized using a modified literature procedure.<sup>3</sup> To a solution of **4** (0.80 g, 2.5 mmol) in 40 mL of DCM was added a solution of 2-naphthoyl chloride (0.48 g, 2.5 mmol) and DIPEA (0.44 mL, 2.5 mmol) dissolved in 20 mL DCM. The solution was refluxed for 24 hours before being diluted with 60 mL H<sub>2</sub>O and extracted with DCM (3 x 60 mL). The organic layers were combined and washed with a saturated NaHCO<sub>3</sub> solution (3 x 60 mL). The organic layer was collected, dried with MgSO<sub>4</sub>, and filtered. The volatiles were removed to yield a dark red oil, which was purified using silica gel chromatography with 9:1 dichloromethane:methanol to give 0.79 g of **5** (66% yield). <sup>1</sup>H NMR (CDCl<sub>3</sub>): 8.57 (m, 2H), 8.36 (s, 1H), 7.90 (m, 5H), 7.64 (td, 2H), 7.57 (m, 3H), 7.36 (m, 3H), 7.15 (m, 2H), 6.94 (d, 1H), 3.90 (s, 4H), 3.82 (s, 2H). <sup>13</sup>C NMR (CDCl<sub>3</sub>): δ165.53, 158.14, 154.77, 148.86, 136.87, 134.76, 132.64, 132.37, 129.36, 128.94, 128.67, 127.79, 127.76, 127.35, 126.87, 123.58, 123.30, 123.06, 123.03, 122.28, 121.70, 116.90, 58.98, 56.80.

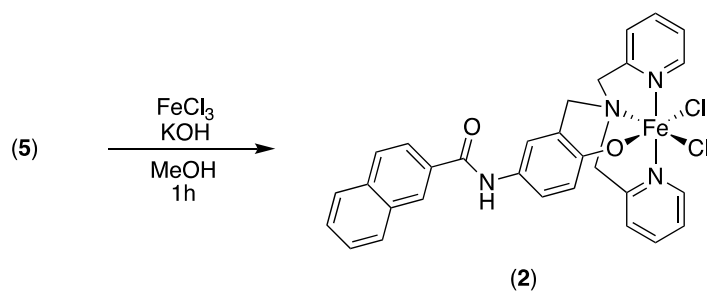

**Scheme S4.** Synthesis of **2**.

**Synthesis of [FeCl<sub>2</sub>(L-Nap)] (**2**).** Compound **2** was synthesized using a modified literature procedure (Figure 2.3).<sup>4</sup> To a solution of **5** (0.20 g, 0.42 mmol) and KOH (0.024 g, 0.42 mmol) in 10 mL MeOH was added a solution of FeCl<sub>3</sub>•6H<sub>2</sub>O (0.11 g, 0.42 mmol) in 8 mL MeOH. The solution immediately turned blue with a visible precipitate. The reaction mixture was stirred at room temperature for 1 hour and filtered. The solid was collected and washed with cold MeOH (3 x 10 mL) to give 0.18 g of **2** (72% yield). The product was crystallized by diffusion of toluene into a concentrated solution of **2** in DCM. Crystals suitable for X-ray diffraction were grown

using the same procedure but with the omission of KOH during the synthesis. Anal. Calcd for  $C_{30}H_{25}C_{12}FeN_4O_2$ : C, 60.02; H, 4.20; N, 9.33. Found: C, 59.93; H, 4.19; N, 9.31.

### Preparation of Buffer Solutions

A citric acid/sodium phosphate buffer system was used for analyses. The buffers were prepared in batches of 20 mL using aqueous solutions of 0.1 M citric acid and 0.2 M  $Na_2HPO_4$ .

**Table S1.** Preparation of Buffer Solutions.

| pH  | Citric Acid (0.1 M, mL) | $Na_2HPO_4$ (0.2 M, mL) |
|-----|-------------------------|-------------------------|
| 3.8 | 12.90                   | 7.10                    |
| 4.6 | 10.65                   | 9.35                    |
| 5.4 | 8.85                    | 11.15                   |
| 6.2 | 6.78                    | 13.22                   |

### Cyclic Voltammetry General Procedure

All electrochemical experiments were performed under an atmosphere of Ar using a CH Instruments 620D potentiostat with a CH Instruments 680 Amp booster. Cyclic voltammograms were acquired using a standard three-electrode cell. A saturated calomel reference electrode (SCE) was used for all experiments. Prior to each acquisition, the platinum auxiliary electrode was polished using 0.05  $\mu$ m alumina powder paste on a cloth-covered polishing pad, followed by rinsing with water and acetonitrile. The glassy carbon working electrode (diameter = 0.30 cm) was polished in the same manner and was subsequently added to either the electrochemical cell or catalyst-soak solution depending on the experiment (specific details below). Ferrocene was used as an internal standard to correct for drifting of the reference electrode.

### Scan Rate Dependence Study

A polished glassy carbon electrode was soaked overnight in a 0.5 mM solution of **2** in acetonitrile. The electrode was thoroughly rinsed with acetonitrile and added to an electrochemical cell containing 5 mL of 0.1 M TBAPF<sub>6</sub> in CH<sub>3</sub>CN. Cyclic voltammograms were taken at a scan rate of 1000, 800, 600, 400, and 200 mV/s respectively.

### Adsorption Time-Dependence Study

A polished glassy carbon electrode was soaked in a 0.5 mM solution of **2** in acetonitrile for time periods ranging from 1 – 1710 minutes. After soaking, the electrode was thoroughly rinsed with acetonitrile and added to an electrochemical cell containing 5 mL of 0.1 M TBAPF<sub>6</sub> in CH<sub>3</sub>CN. Cyclic voltammograms were taken at a scan rate of 200 mV/s 5 minutes after adding the glassy carbon electrode to the cell.

## Solvent-Stability Study

A polished glassy carbon electrode was soaked overnight in a 0.5 mM solution of **2** in acetonitrile. The electrode was thoroughly rinsed with acetonitrile followed by the solvent (CH<sub>3</sub>CN, DCM, acetone, pentane, EtOH, or water) used in the subsequent soak. The electrode was suspended in 15 mL of a particular solvent (CH<sub>3</sub>CN, DCM, acetone, pentane, EtOH, or water) for 30 minutes before being removed, rinsed with acetonitrile, and added to an electrochemical cell containing 5 mL of 0.1 M TBAPF<sub>6</sub> in CH<sub>3</sub>CN. Cyclic voltammograms were taken at a scan rate of 200 mV/s 2 minutes after adding the glassy carbon electrode to the cell.

## Catalyst Adsorption Control Study

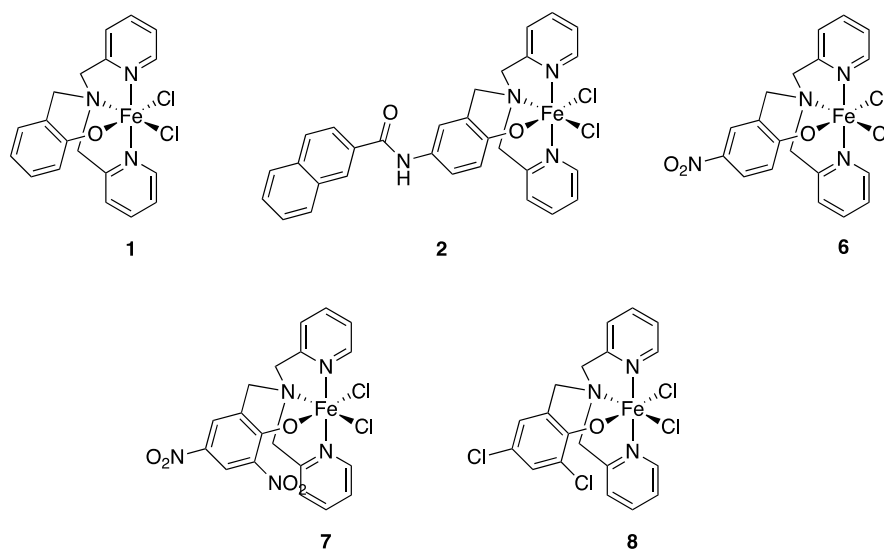

**Figure S1.** Structure of catalysts used in the adsorption control study.

Polished glassy carbon electrodes were soaked overnight in a 0.5 mM solution of either **1**, **2**, **6**, **7**, or **8** in acetonitrile. After soaking, the electrodes were thoroughly rinsed with acetonitrile and added to respective electrochemical cells containing 5 mL of 0.1 M TBAPF<sub>6</sub> in CH<sub>3</sub>CN. Cyclic



voltammograms were taken at a scan rate of 200 mV/s 10 minutes after adding the glassy carbon electrode to the cell.

#### Acid Addition Studies

A polished glassy carbon electrode was soaked overnight in a 0.5 mM solution of **2** in acetonitrile. The electrode was rinsed with acetonitrile and added to an electrochemical cell containing 5 mL of 0.1 M TBAPF<sub>6</sub> in CH<sub>3</sub>CN. Cyclic voltammograms, which were taken 10 minutes after addition of the working electrode, were taken without acid and after additions of 10, 20, 30, and 40 μL of either trifluoroacetic acid (0.2 M) or p-toluenesulfonic acid (0.2 M). The working electrode was polished and resoaked overnight in **2** before each scan.

#### pH Dependence Study

A polished glassy carbon electrode was soaked overnight in a 0.5 mM solution of **2** in acetonitrile. The electrode was rinsed with acetonitrile and water before it was added to an electrochemical cell containing 5 mL of an aqueous buffer solution (pH = 3.8 – 6.2), which served as the electrolyte. Cyclic voltammograms, which were run 2 minutes after addition of the electrode, were taken at 100 mV/s from 0.0 to -1.4 V for pH = 3.8 and from 0.0 to -1.6 V for pH = 4.6 – 6.2.

### **Supplementary Text**

#### Determination of Overpotential

The overpotential in acetonitrile was calculated according to a literature procedure.<sup>5</sup>  $E_{ref}$  for 1 mM TFA in CH<sub>3</sub>CN, which is given in the literature to be -0.71 V vs. Fc<sup>+</sup>/Fc, can be subtracted from  $E_{1/2}$  of **2** in the presence of 1 mM TFA, which is determined to be -1.19 V vs. Fc<sup>+</sup>/Fc as demonstrated in Fig S2.<sup>6</sup> Therefore, the overpotential is calculated as such:

$$\begin{aligned} \text{Overpotential} &= |E_{1/2} - E_{ref}| \\ &= |(-1.19 \text{ V vs } Fc^+/Fc) - (-0.71 \text{ V vs } Fc^+/Fc)| \\ &= 480 \text{ mV} \end{aligned}$$

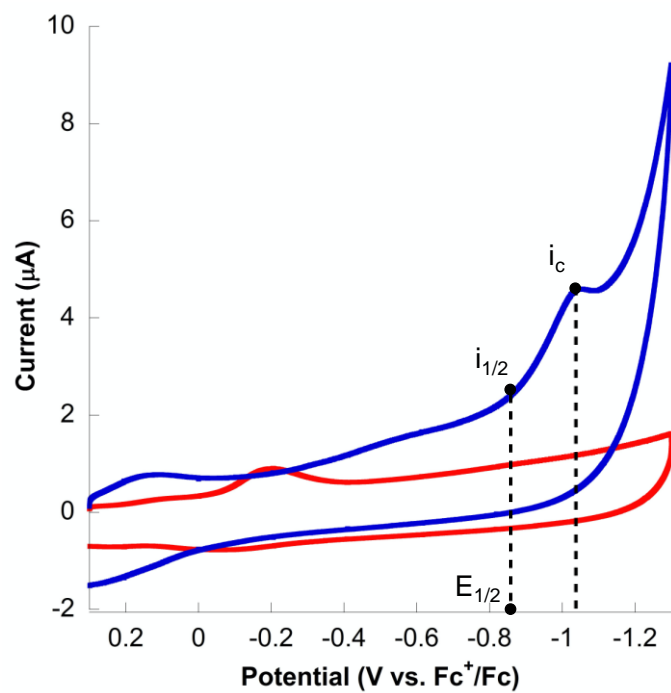

**Figure S2.** Cyclic voltammograms of surface-adsorbed **2** in 5 mL of 0.1 M TBAPF<sub>6</sub> in CH<sub>3</sub>CN at 200 mV/s without acid (red) and in the presence of 1.6 mM TFA (blue) with  $i_c$ ,  $i_{1/2}$ , and  $E_{1/2}$  highlighted.

### Calculation of $i_c/i_p$

The  $i_c$  and  $i_p$  values were found as demonstrated in Fig S3 and the  $i_c/i_p$  value was calculated as such:<sup>4</sup>

$$\frac{i_c}{i_p} = \frac{4.231}{0.774} = 5.46$$

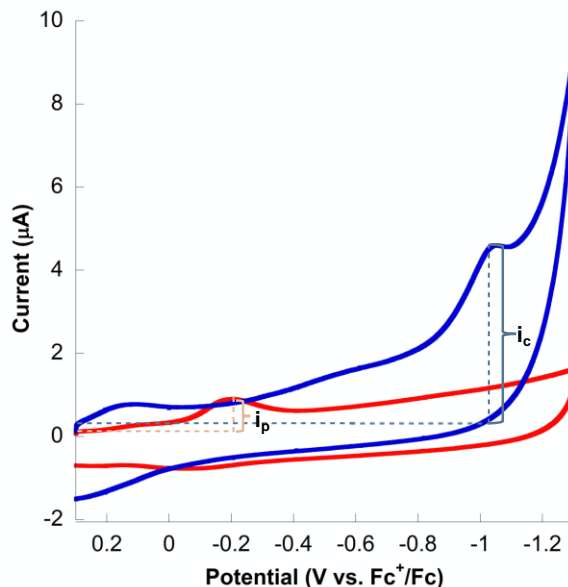

**Figure S3.** Cyclic voltammograms of surface-adsorbed **2** in 5 mL of 0.1 M TBAPF<sub>6</sub> in CH<sub>3</sub>CN at 200 mV/s without acid (red) and in the presence of 1.6 mM TFA (blue) with  $i_c$  and  $i_p$ , highlighted.

### Surface Coverage Calculation

Using the relationship between peak current and potential sweep rate for a surface-adsorbed analyte, the surface coverage of **2** on the glassy carbon electrode (0.30 cm diameter) at 298 K can be calculated as such:<sup>7</sup>

$$i_p = \frac{n^2 F^2}{4RT} v A \Gamma^*$$

$$i_p = \frac{1^2 * 96,485^2}{4 * 8.314 * 298} * v * 0.071 * \Gamma^* = (6.64 * 10^5) * v * \Gamma^*$$

$$\frac{i_p}{v} = slope = 5.09 * 10^{-6} = (6.64 * 10^5) * \Gamma^*$$

$$\Gamma^* = 7.7 * 10^{-11} \text{ mol/cm}^2$$

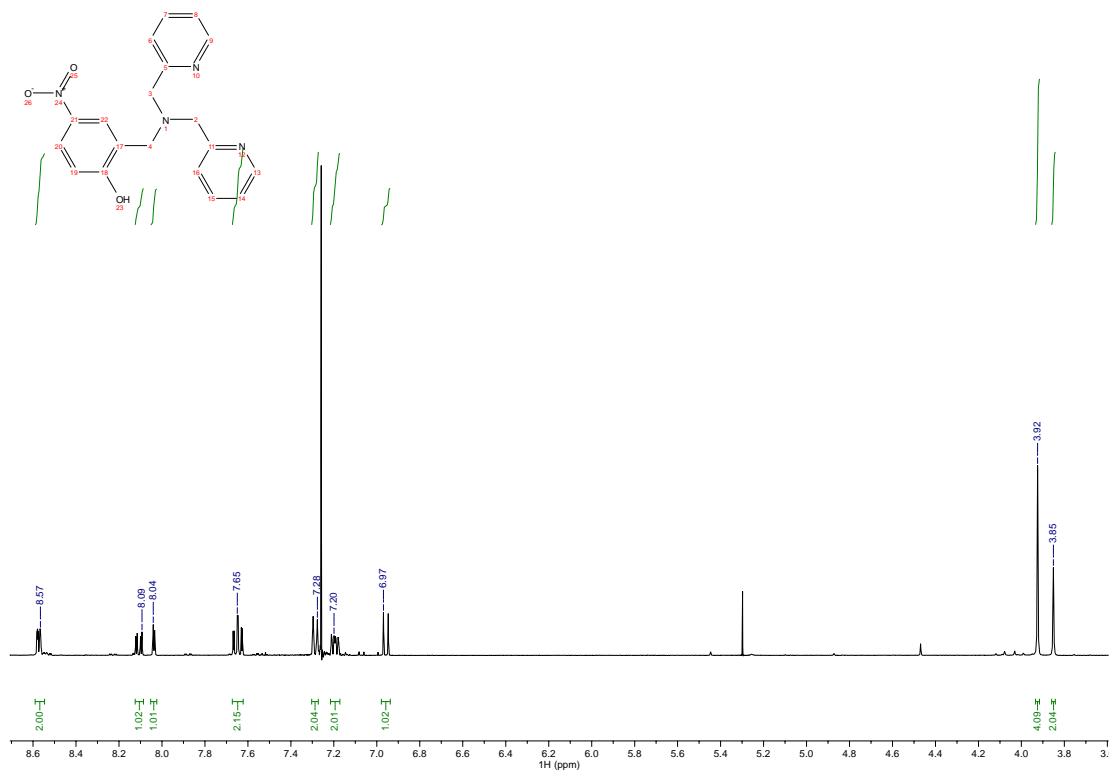

**Figure S4.** <sup>1</sup>H NMR spectrum of **3** with integrals in green.

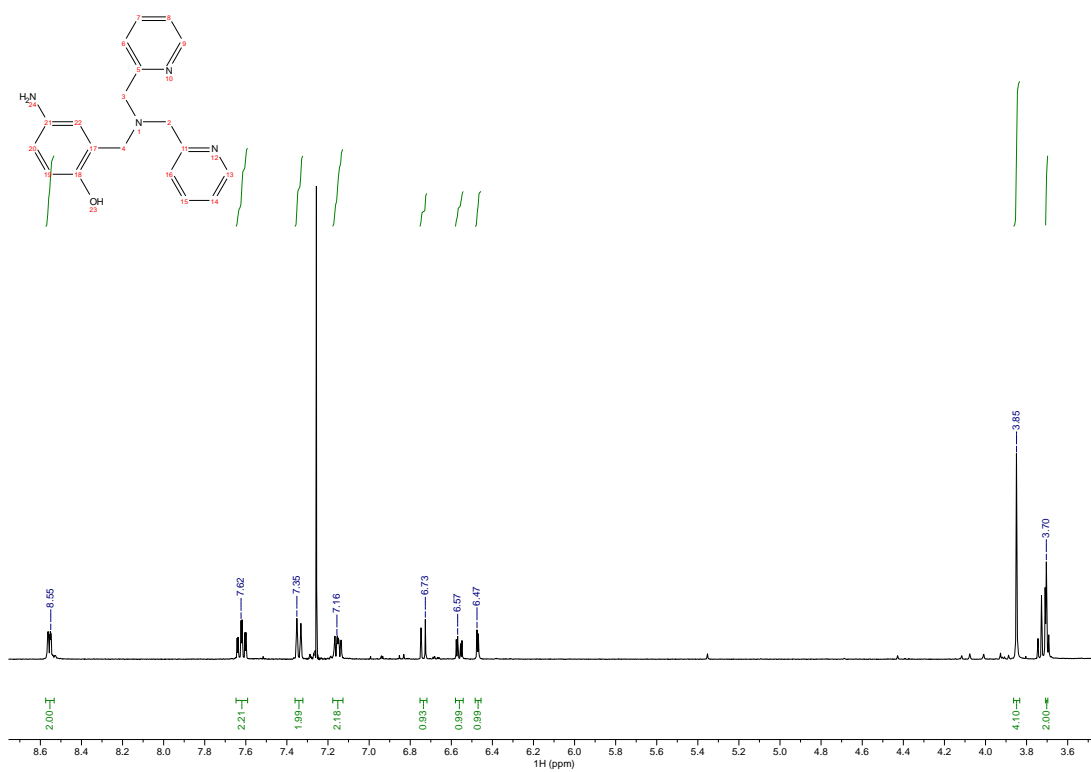

**Figure S5.** <sup>1</sup>H NMR spectrum of **4** with integrals in green.

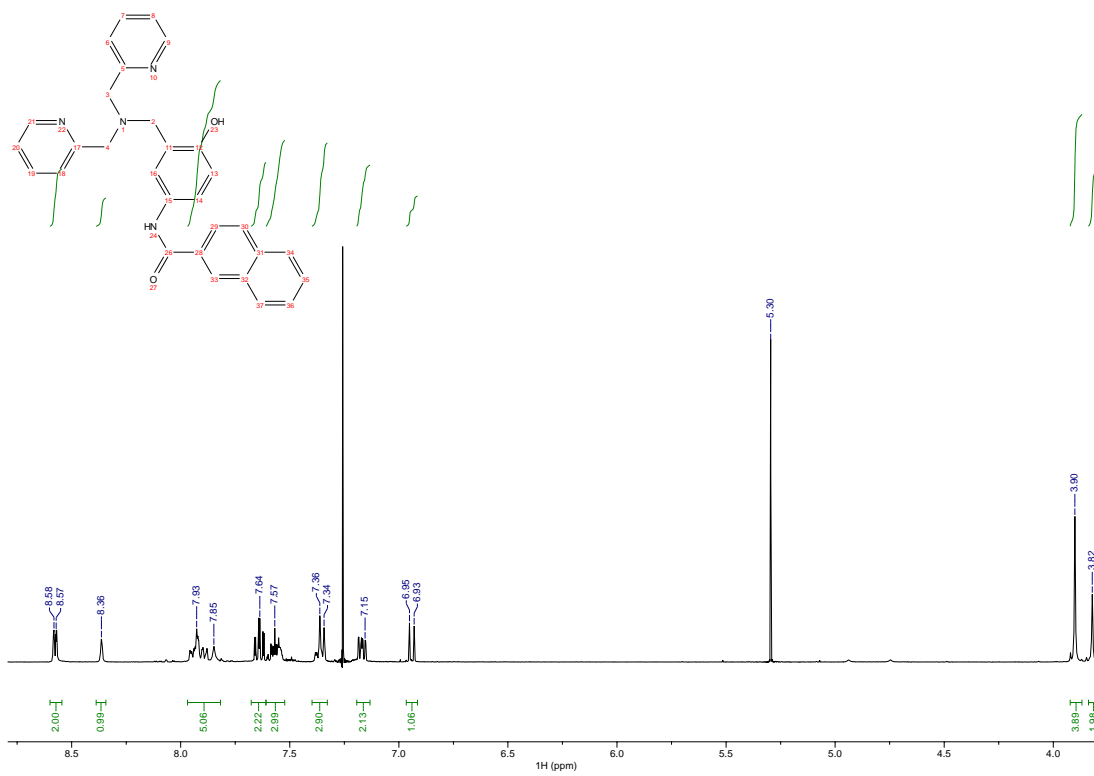

**Figure S6.** <sup>1</sup>H NMR spectrum of **5** with integrals in green.

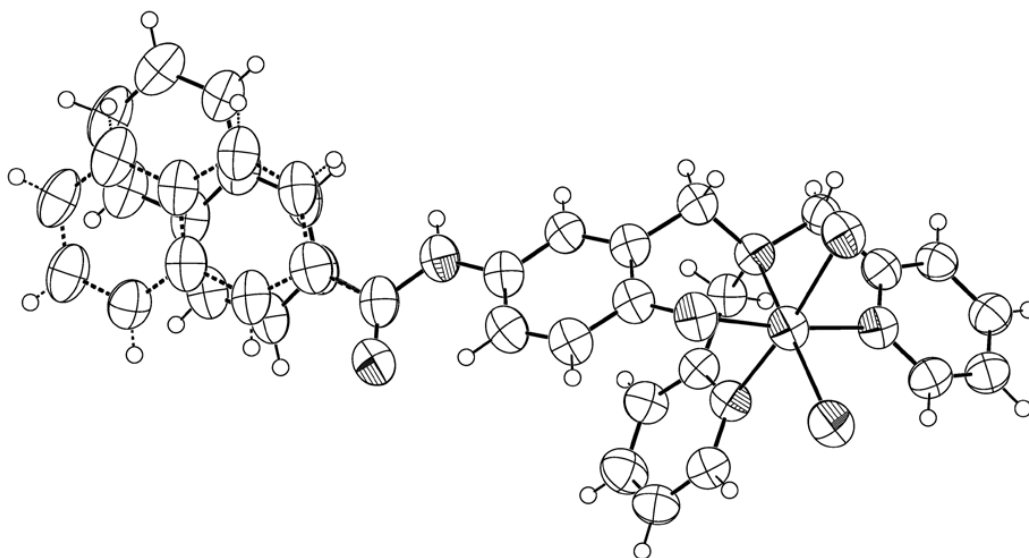

**Figure S7.** ORTEP diagram of **2** with disorder visible in the naphthalenyl group.

**Table S2.** Crystal data and structure refinement for **2**.

|                                                     |                                                                |
|-----------------------------------------------------|----------------------------------------------------------------|
| Empirical formula                                   | C30 H25 Cl2 Fe N4 O2                                           |
| Formula weight                                      | 600.29                                                         |
| Temperature                                         | 99.98(10) K                                                    |
| Wavelength                                          | 1.54184 Å                                                      |
| Crystal system                                      | orthorhombic                                                   |
| Space group                                         | <i>Pbca</i>                                                    |
| Unit cell dimensions                                | $a = 11.4056(2)$ Å<br>$b = 22.8180(4)$ Å<br>$c = 25.3841(5)$ Å |
| Volume                                              | $6606.3(2)$ Å <sup>3</sup>                                     |
| Z                                                   | 8                                                              |
| Density (calculated)                                | 1.207 Mg/m <sup>3</sup>                                        |
| Absorption coefficient                              | 5.388 mm <sup>-1</sup>                                         |
| <i>F</i> (000)                                      | 2472                                                           |
| Crystal color, morphology                           | blue, plate                                                    |
| Crystal size                                        | 0.19 x 0.102 x 0.028 mm <sup>3</sup>                           |
| Theta range for data collection                     | 3.482 to 78.003°                                               |
| Index ranges                                        | -14 ≤ <i>h</i> ≤ 13, -28 ≤ <i>k</i> ≤ 25, -30 ≤ <i>l</i> ≤ 32  |
| Reflections collected                               | 41178                                                          |
| Independent reflections                             | 6941 [ <i>R</i> (int) = 0.0590]                                |
| Observed reflections                                | 5181                                                           |
| Completeness to theta = 74.504°                     | 99.7%                                                          |
| Absorption correction                               | Multi-scan                                                     |
| Max. and min. transmission                          | 1.00000 and 0.35954                                            |
| Refinement method                                   | Full-matrix least-squares on <i>F</i> <sup>2</sup>             |
| Data / restraints / parameters                      | 6941 / 250 / 447                                               |
| Goodness-of-fit on <i>F</i> <sup>2</sup>            | 1.049                                                          |
| Final <i>R</i> indices [ <i>I</i> > 2σ( <i>I</i> )] | <i>R</i> 1 = 0.0556, <i>wR</i> 2 = 0.1556                      |
| <i>R</i> indices (all data)                         | <i>R</i> 1 = 0.0724, <i>wR</i> 2 = 0.1695                      |
| Largest diff. peak and hole                         | 0.768 and -0.692 e.Å <sup>-3</sup>                             |

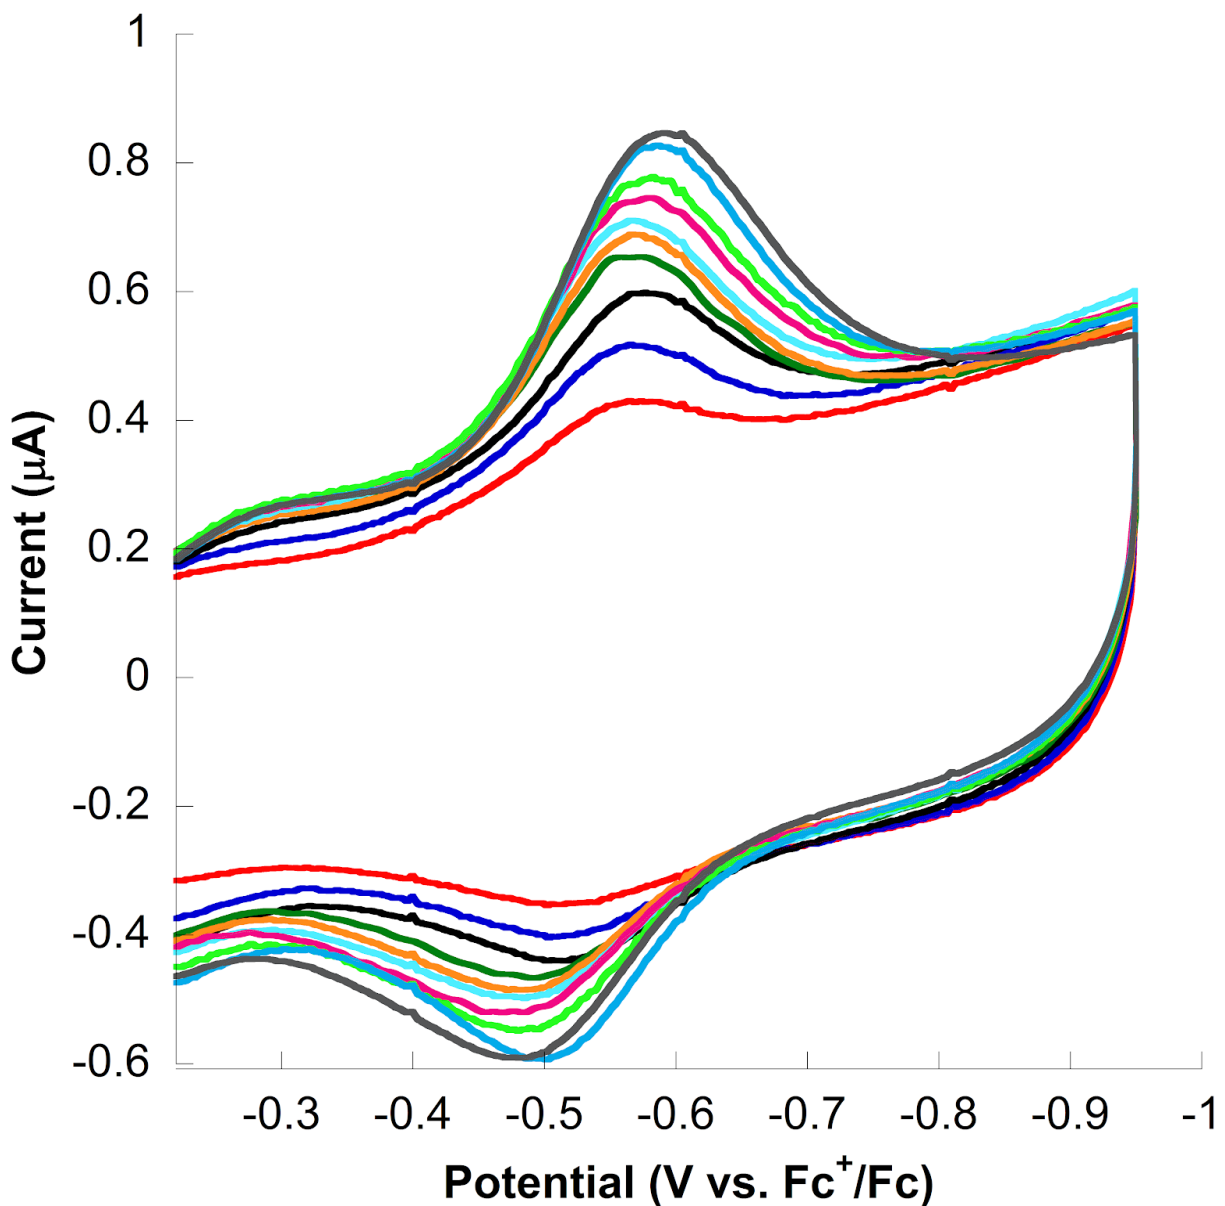

**Figure S8.** Adsorption time-dependence study: cyclic voltammograms, taken in 5 mL of 0.1 M TBAPF<sub>6</sub> in CH<sub>3</sub>CN at 200 mV/s, for the time-dependent soak study of **2**. Time periods, in minutes, include 1 (red), 5 (blue), 10 (black), 20 (green), 30 (orange), 60 (cyan), 120 (magenta), 180 (light green), 360 (light blue), and 720 (grey).



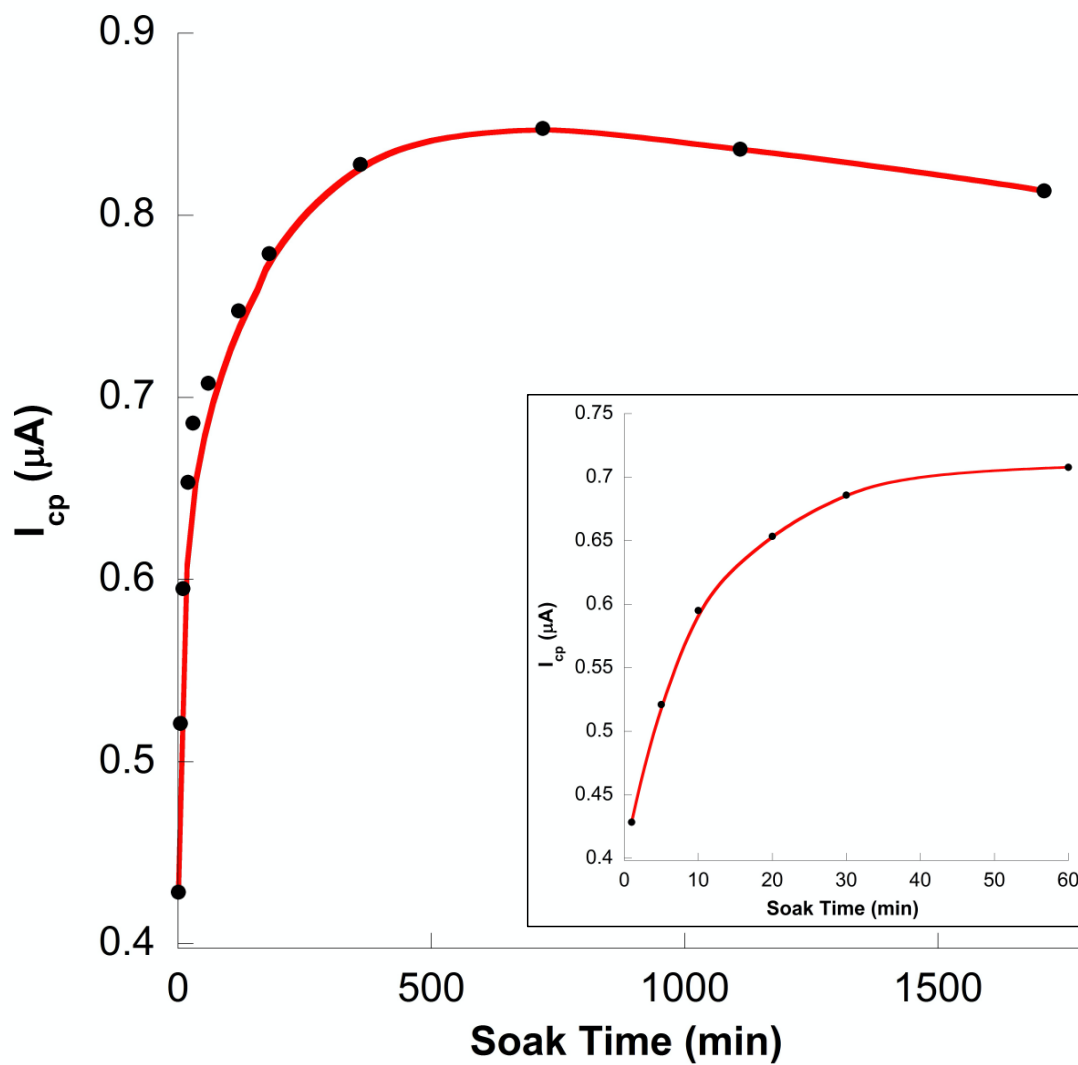

**Figure S9.** Adsorption time-dependence study: adsorption kinetics of **2** as a function of time. Inset plot highlights rapid adsorption during the first 60 minutes.

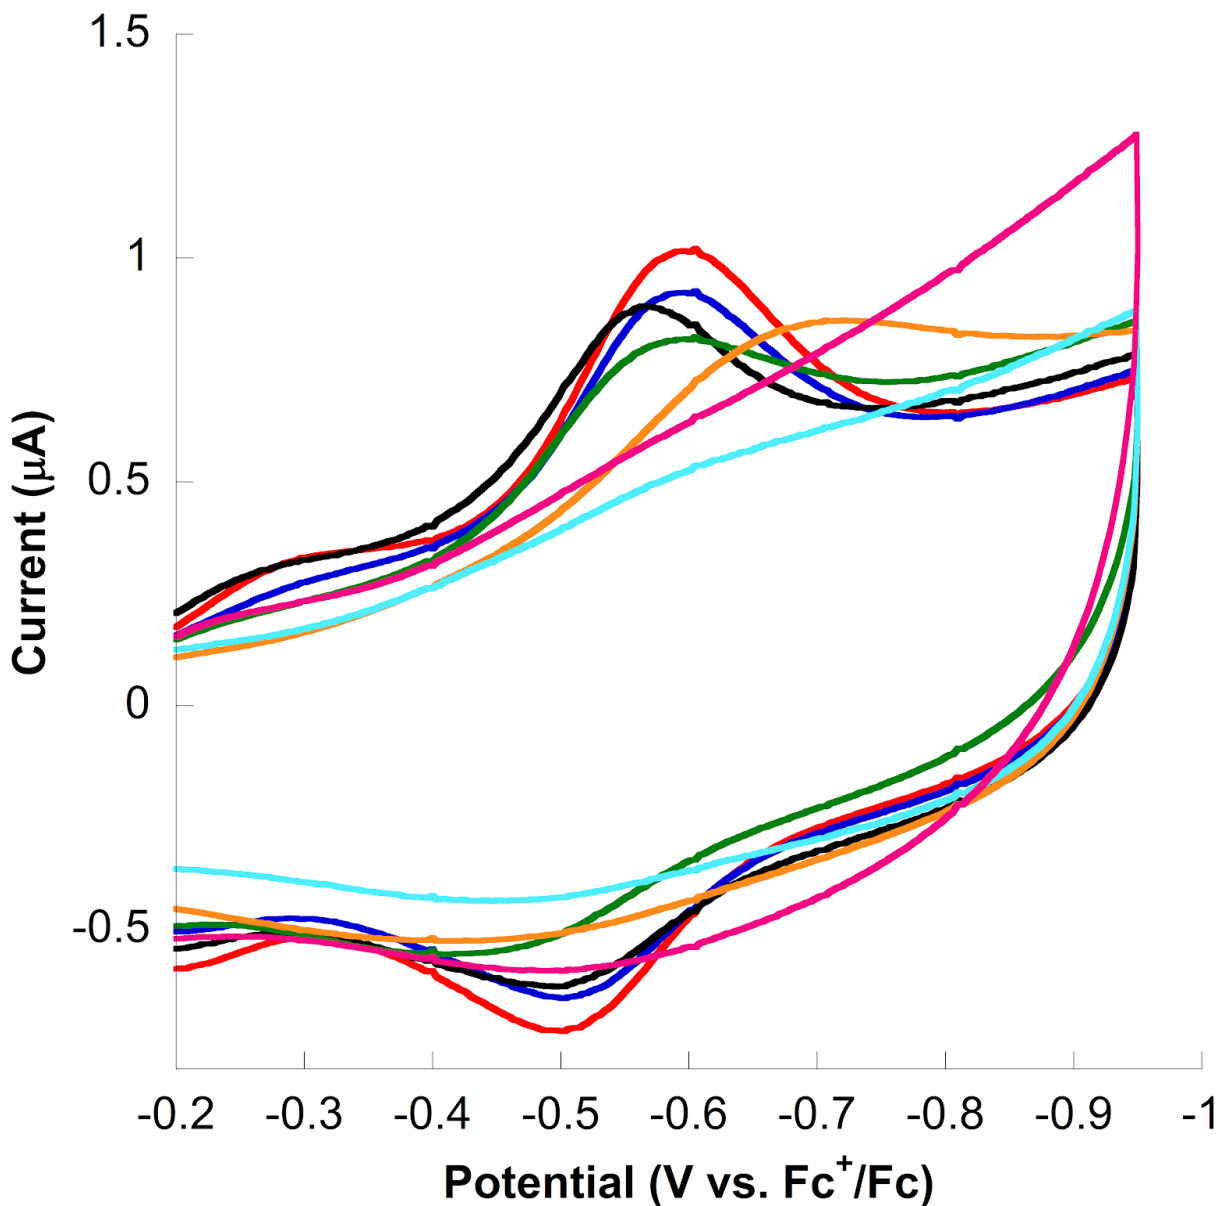

**Figure S10.** Solvent-stability study: impact of 30-minute solvent soaks on the adsorption of **2** to the surface of a glassy-carbon electrode. Cyclic voltammograms were scanned at 200 mV/s in 5 mL of 0.1 M TBAPF<sub>6</sub> in CH<sub>3</sub>CN for the control (red) and after 30-minute electrode soaks in acetonitrile (blue), dichloromethane (black), pentane (green), acetone (orange), ethanol (cyan), and water (magenta).

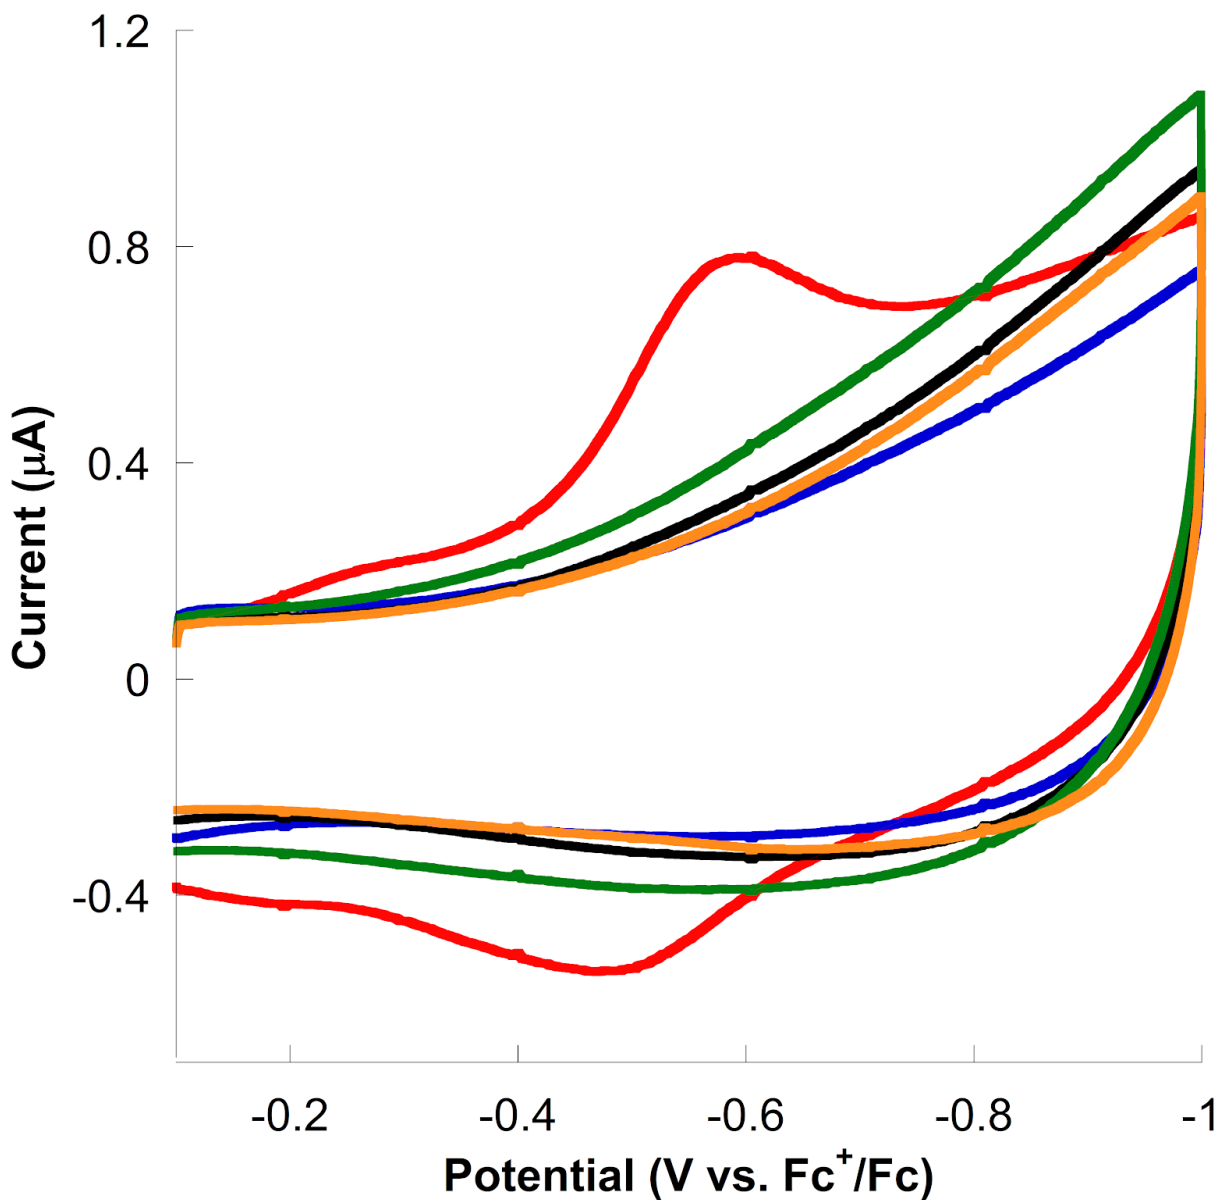

**Figure S11.** Catalyst adsorption control study: cyclic voltammograms were scanned at 200 mV/s in 5 mL of 0.1 M TBAPF<sub>6</sub> in CH<sub>3</sub>CN following overnight soaking of the glassy carbon working electrode in **1** (blue), **2**, (red), **6** (black), **7** (green), and **8** (orange).

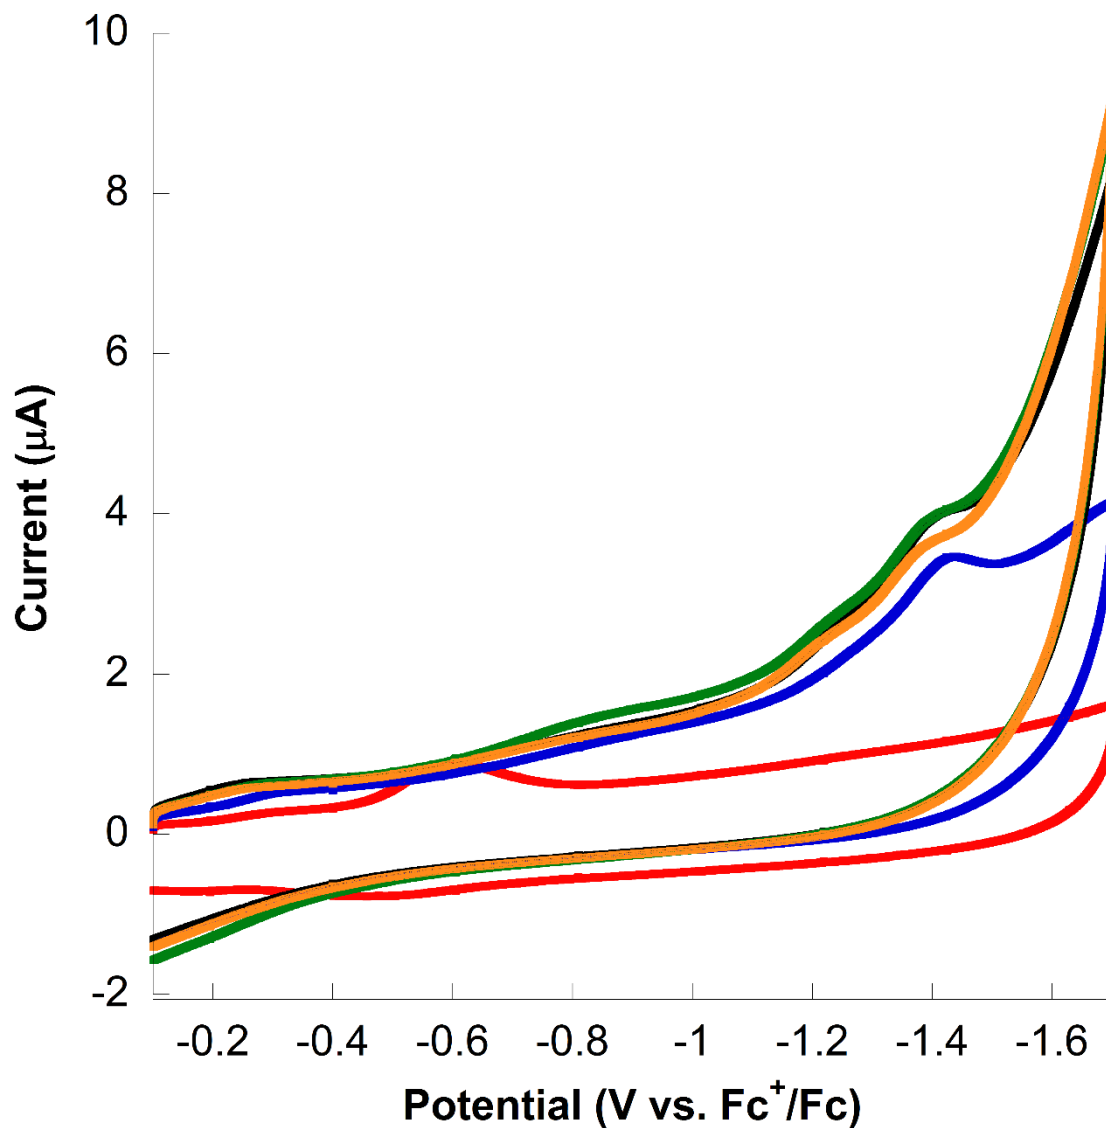

**Figure S12.** Cyclic voltammograms of surface adsorbed **2** in 5 mL of 0.1 M TBAPF<sub>6</sub> in CH<sub>3</sub>CN in the presence of no acid (red), 0.4 mM (blue), 0.8 mM (black), 1.2 mM (green), and 1.6 mM (orange) tosic acid at 200 mV/s.

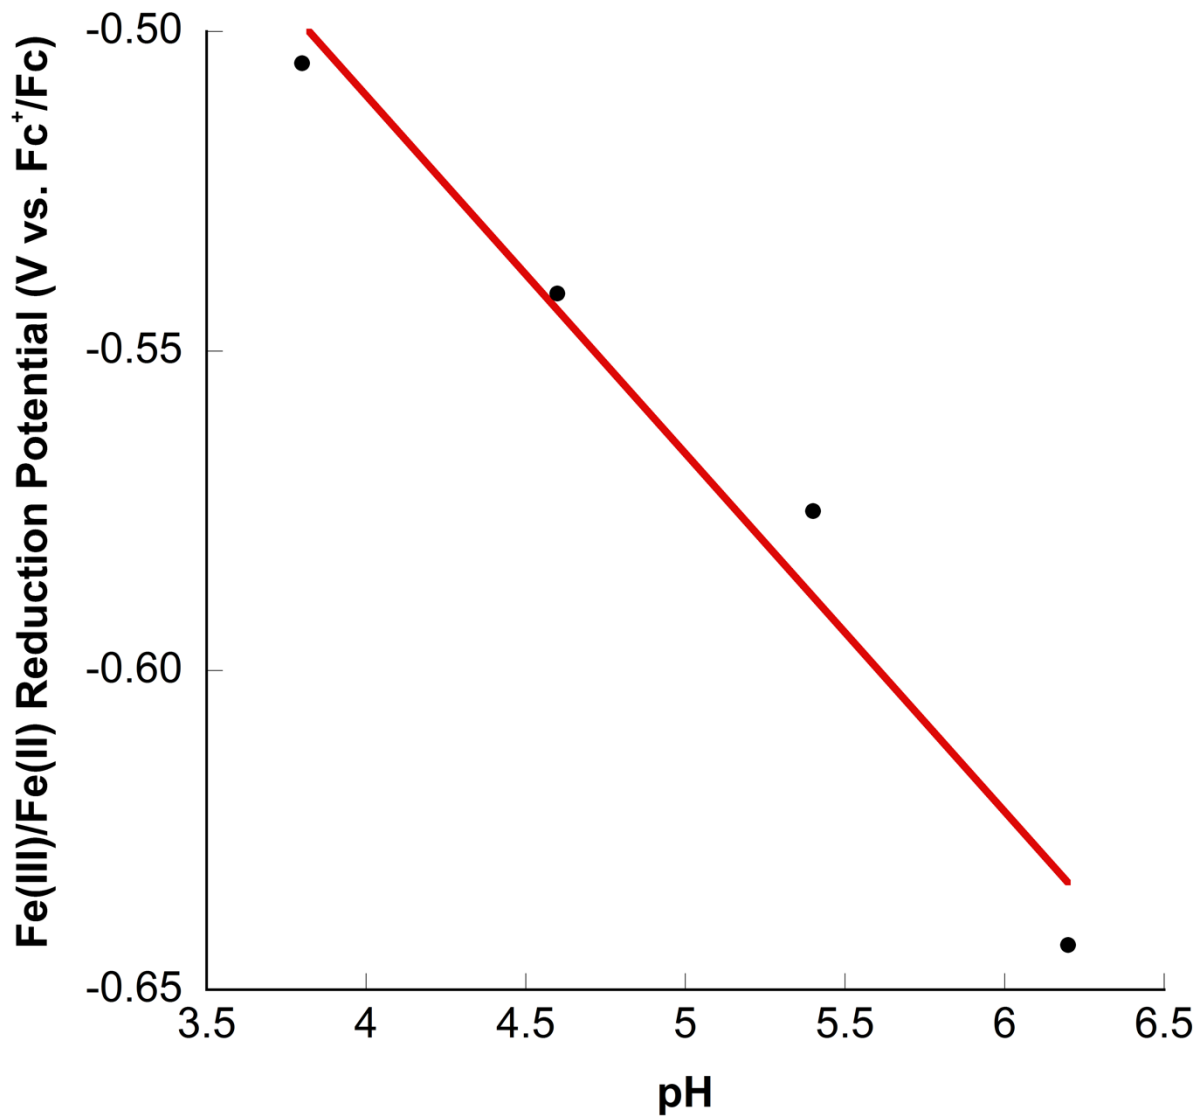

**Figure S13.** Linear relationship ( $R^2 = 0.991$ ) between Fe(III)/Fe(II) reduction potential and pH with a slope of 52 mV.

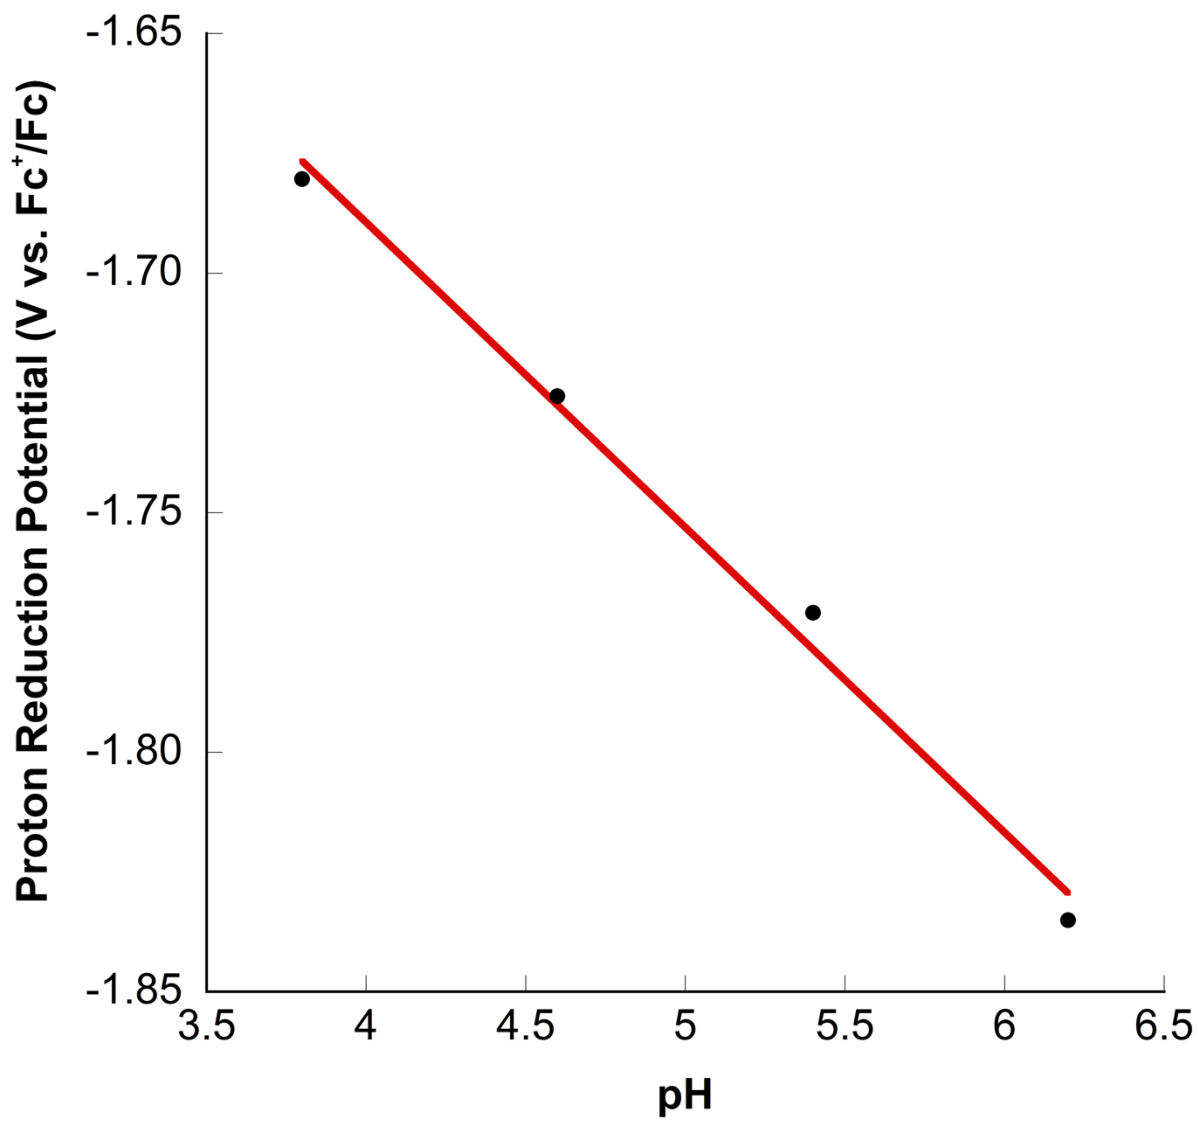

**Figure S14.** Linear relationship ( $R^2 = 0.996$ ) between catalytic proton reduction wave potential and pH with a slope of 64 mV.

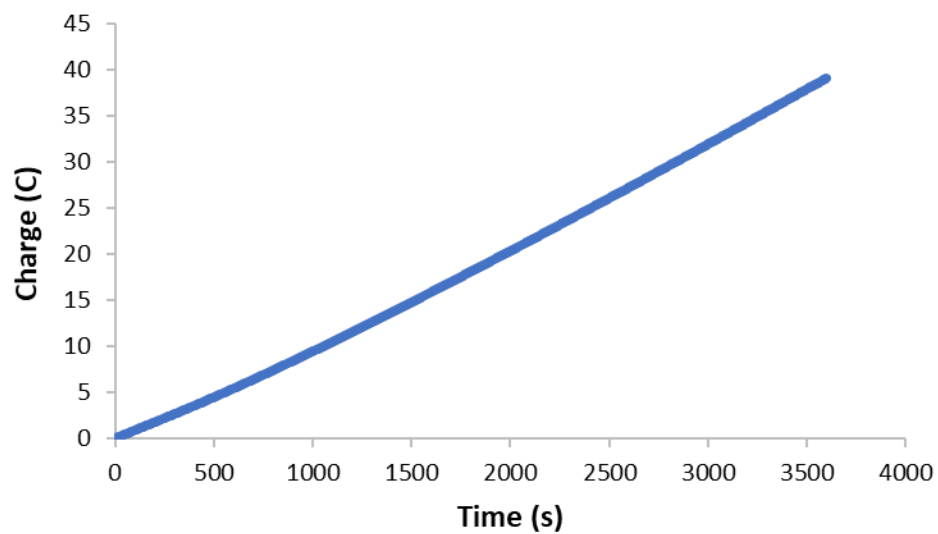

**Figure S15.** Bulk Electrolysis using glassy carbon electrode soaked in 0.5 mM **2** for 720 minutes. The bulk electrolysis was run in a 0.1 M solution of TBAPF<sub>6</sub> in CH<sub>3</sub>CN with 65 mM TFA. The potential was held at -1.6 V vs. Fc<sup>+</sup>/Fc for 1800 seconds resulting in a charge of 39.1 C. A GC of the headspace gases corresponded to a faradaic yield of 99%.

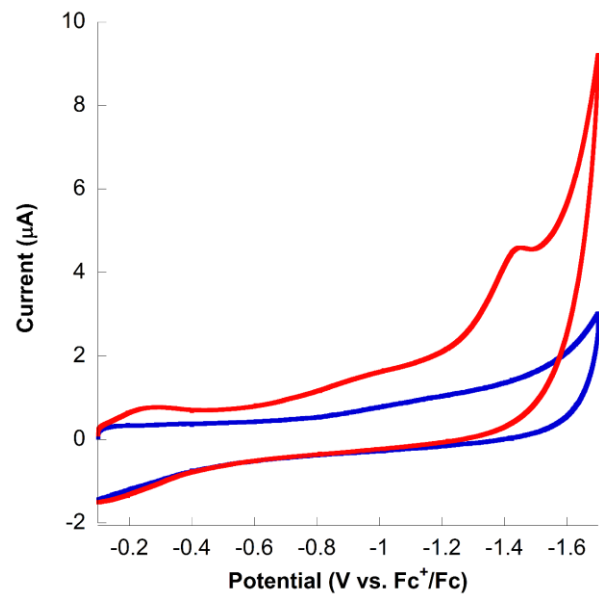

**Figure S16.** CVs of 1.6 mM TFA in CH<sub>3</sub>CN for catalyst modified glassy carbon electrode (red) and a clean glassy carbon electrode without catalyst (blue).



## References

1. C. L. Hartley, R. J. DiRisio, T. Y. Chang, W. Zhang and W. R. McNamara, *Polyhedron*, 2016, **114**, 133–137
2. Zhang, W. Dye-Sensitized TiO<sub>2</sub> Modified with Iron Polypyridyl Catalyst for Photocatalytic Hydrogen Evolution. *Master's Thesis, College of William and Mary*. **2016**.
3. N. A. Race, W. Zhang, M. E. Screen, B. A. Barden and W. R. McNamara, *Chem. Commun.*, 2018, **54**, 3290–3293.
4. G. P. Connor, K. J. Mayer, C. S. Tribble and W. R. McNamara, *Inorg. Chem.*, 2014, **53**, 5408–5410.
5. G. A. N. Felton, R. S. Glass, D. L. Lichtenberger, D. H. Evans. *Inorg. Chem.*, 2013, **49**, 9181.
6. V. Fourmond, P. Jacques, M. Fontecave and V. Artero. *Inorg. Chem.*, 2010, **49**, 10338–10347.
7. N. Elgrishi, K. Rountree, B. McCarthy, E. Rountree, T. Eisenhart and J. Dempsey. *J. Chem. Edu.*, 2018, **95**, 197–206.
